# Supplementary material
Source: MDPI journal article supplement (https://www.mdpi.com/2073-4344/13/9/1233)
Supplement: s1 [file s1]

# N-Doped TiO<sub>2</sub>-Nb<sub>2</sub>O<sub>5</sub> Sol–Gel Catalysts: Synthesis, Characterization, Adsorption Capacity, Photocatalytic and Antioxidant Activity

Maria E. K. Fuziki <sup>1,\*</sup>, Laura S. Ribas <sup>2</sup>, Eduardo Abreu <sup>1</sup>, Luciano Fernandes <sup>3</sup>,  
Onélia A. A. dos Santos <sup>1</sup>, Rodrigo Brackmann <sup>4</sup>, Jose L. D. de Tuesta <sup>5</sup>, Angelo M. Tusset <sup>6</sup>,  
and Giane G. Lenzi <sup>6</sup>

<sup>1</sup> Department of Chemical Engineering, State University of Maringá, Paraná, Maringá, 87020-900, Brazil

<sup>2</sup> Department of Chemical Engineering, Federal University of Technology-Paraná, Paraná,  
Doutor Washington Subtil Chueire St. 330, Ponta Grossa 84017-220, Brazil

<sup>3</sup> Department of Chemistry, Federal University of Technology-Paraná, Paraná,  
Doutor Washington Subtil Chueire St. 330, Ponta Grossa 84017-220, Brazil

<sup>4</sup> Department of Chemistry, Federal University of Technology-Paraná, Paraná, Via do Conhecimento, Km 1,  
85503-390—Pato Branco, Brazil

<sup>5</sup> Department of Chemical and Environmental Technology, Rey Juan Carlos University, 28933 Móstoles, Spain

<sup>6</sup> Department of Production Engineering, Federal University of Technology-Paraná,  
Paraná-Doutor Washington Subtil Chueire St. 330, Ponta Grossa 84017-220, Brazil

\* Correspondence: mariafuziki@gmail.com

## 1. Thermogravimetric analysis

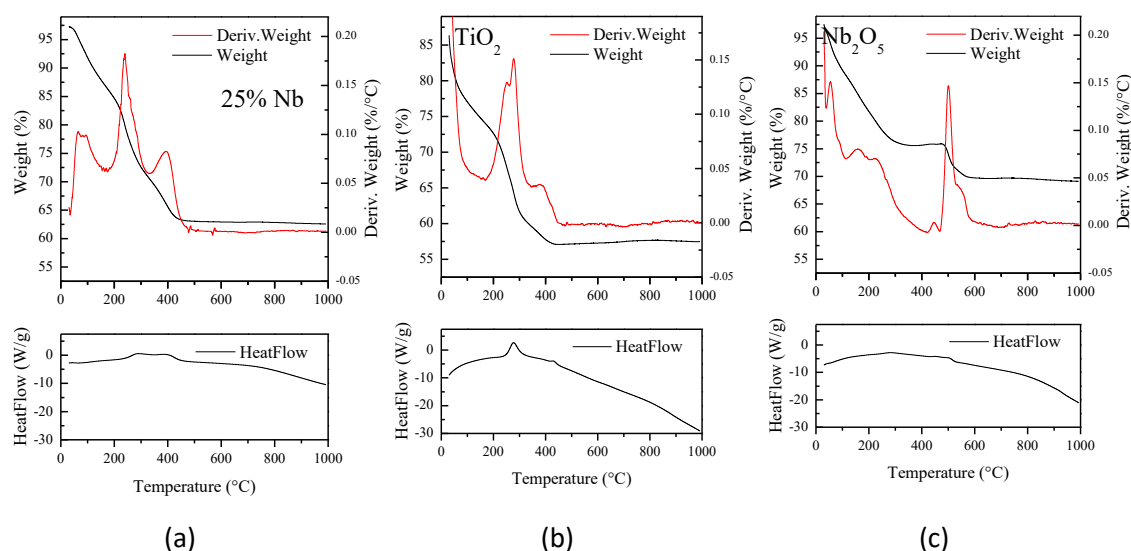

**Figure S1** – Thermogravimetric analysis results of samples: (a) 25%Nb catalyst, not calcined; (b) TiO<sub>2</sub> catalyst, not calcined; (c) Nb<sub>2</sub>O<sub>5</sub> catalyst, not calcined.

## 2. Experimental design data

### 2.1. Four-factors factorial design (2<sup>4</sup>) – SA Photocatalysis

Considering the variables with their real values, and  $R^2=0.96405$  e  $R^2_{adj}=0.91461$ .

**Table S1** – Effects estimates and model coefficients of the four-factor experimental design (2<sup>4</sup>). Significant effects are highlighted in bold.

|                       | Effect          | Std.Err.        | t(3)            | p               | -95.%           | +95.%           | Coeff.          | Std.Err.        | -95.%           | +95.%           |
|-----------------------|-----------------|-----------------|-----------------|-----------------|-----------------|-----------------|-----------------|-----------------|-----------------|-----------------|
| <b>Mean/Interc.</b>   | <b>40.7894</b>  | <b>0.950971</b> | <b>42.8924</b>  | <b>0.000028</b> | <b>37.7630</b>  | <b>43.8158</b>  | <b>40.7894</b>  | <b>0.950971</b> | <b>37.7630</b>  | <b>43.81584</b> |
| Curvatr.              | 6.6665          | 4.252873        | 1.5675          | 0.214985        | -6.8680         | 20.2011         | 3.3333          | 2.126436        | -3.4340         | 10.10053        |
| <b>(1)T (C)</b>       | <b>-20.8075</b> | <b>1.901942</b> | <b>-10.9401</b> | <b>0.001635</b> | <b>-26.8603</b> | <b>-14.7547</b> | <b>-10.4038</b> | <b>0.950971</b> | <b>-13.4302</b> | <b>-7.37734</b> |
| <b>(2)%Nb</b>         | <b>-15.9425</b> | <b>1.901942</b> | <b>-8.3822</b>  | <b>0.003561</b> | <b>-21.9953</b> | <b>-9.8897</b>  | <b>-7.9713</b>  | <b>0.950971</b> | <b>-10.9977</b> | <b>-4.94484</b> |
| (3)NH <sub>4</sub> OH | 5.5962          | 1.901942        | 2.9424          | 0.060394        | -0.4566         | 11.6491         | 2.7981          | 0.950971        | -0.2283         | 5.82453         |
| <b>(4)pH</b>          | <b>15.2366</b>  | <b>1.901942</b> | <b>8.0111</b>   | <b>0.004060</b> | <b>9.1838</b>   | <b>21.2894</b>  | <b>7.6183</b>   | <b>0.950971</b> | <b>4.5919</b>   | <b>10.64472</b> |
| <b>1 by 2</b>         | <b>16.9949</b>  | <b>1.901942</b> | <b>8.9355</b>   | <b>0.002957</b> | <b>10.9420</b>  | <b>23.0477</b>  | <b>8.4974</b>   | <b>0.950971</b> | <b>5.4710</b>   | <b>11.52384</b> |
| <b>1 by 3</b>         | <b>-7.0646</b>  | <b>1.901942</b> | <b>-3.7144</b>  | <b>0.033938</b> | <b>-13.1174</b> | <b>-1.0117</b>  | <b>-3.5323</b>  | <b>0.950971</b> | <b>-6.5587</b>  | <b>-0.50587</b> |
| <b>1 by 4</b>         | <b>9.7367</b>   | <b>1.901942</b> | <b>5.1194</b>   | <b>0.014427</b> | <b>3.6839</b>   | <b>15.7896</b>  | <b>4.8684</b>   | <b>0.950971</b> | <b>1.8420</b>   | <b>7.89479</b>  |
| 2 by 3                | -4.7499         | 1.901942        | -2.4974         | 0.087908        | -10.8027        | 1.3029          | -2.3750         | 0.950971        | -5.4014         | 0.65146         |
| 2 by 4                | 3.9528          | 1.901942        | 2.0783          | 0.129214        | -2.1000         | 10.0056         | 1.9764          | 0.950971        | -1.0500         | 5.00281         |
| 3 by 4                | 0.5557          | 1.901942        | 0.2922          | 0.789185        | -5.4971         | 6.6086          | 0.2779          | 0.950971        | -2.7486         | 3.30428         |

**Table S2** – Effects estimates and model coefficients of the four-factor experimental design (2<sup>4</sup>). Significant effects are highlighted in bold.

|                       | SS              | df       | MS              | F               | p               |
|-----------------------|-----------------|----------|-----------------|-----------------|-----------------|
| Curvatr.              | 35.554          | 1        | 35.554          | 2.4572          | 0.214985        |
| <b>(1)Temperatura</b> | <b>1731.809</b> | <b>1</b> | <b>1731.809</b> | <b>119.6866</b> | <b>0.001635</b> |
| <b>(2)%Nb</b>         | <b>1016.654</b> | <b>1</b> | <b>1016.654</b> | <b>70.2617</b>  | <b>0.003561</b> |
| (3)NH <sub>4</sub> OH | 125.272         | 1        | 125.272         | 8.6576          | 0.060394        |
| <b>(4)pH</b>          | <b>928.617</b>  | <b>1</b> | <b>928.617</b>  | <b>64.1773</b>  | <b>0.004060</b> |
| <b>1 by 2</b>         | <b>1155.301</b> | <b>1</b> | <b>1155.301</b> | <b>79.8436</b>  | <b>0.002957</b> |
| <b>1 by 3</b>         | <b>199.632</b>  | <b>1</b> | <b>199.632</b>  | <b>13.7967</b>  | <b>0.033938</b> |
| <b>1 by 4</b>         | <b>379.217</b>  | <b>1</b> | <b>379.217</b>  | <b>26.2080</b>  | <b>0.014427</b> |
| 2 by 3                | 90.247          | 1        | 90.247          | 6.2370          | 0.087908        |
| 2 by 4                | 62.498          | 1        | 62.498          | 4.3193          | 0.129214        |
| 3 by 4                | 1.235           | 1        | 1.235           | 0.0854          | 0.789185        |
| Lack of Fit           | 170.146         | 5        | 34.029          | 2.3518          | 0.256358        |
| Pure Error            | 43.409          | 3        | 14.470          |                 |                 |
| Total SS              | 5939.590        | 19       |                 |                 |                 |

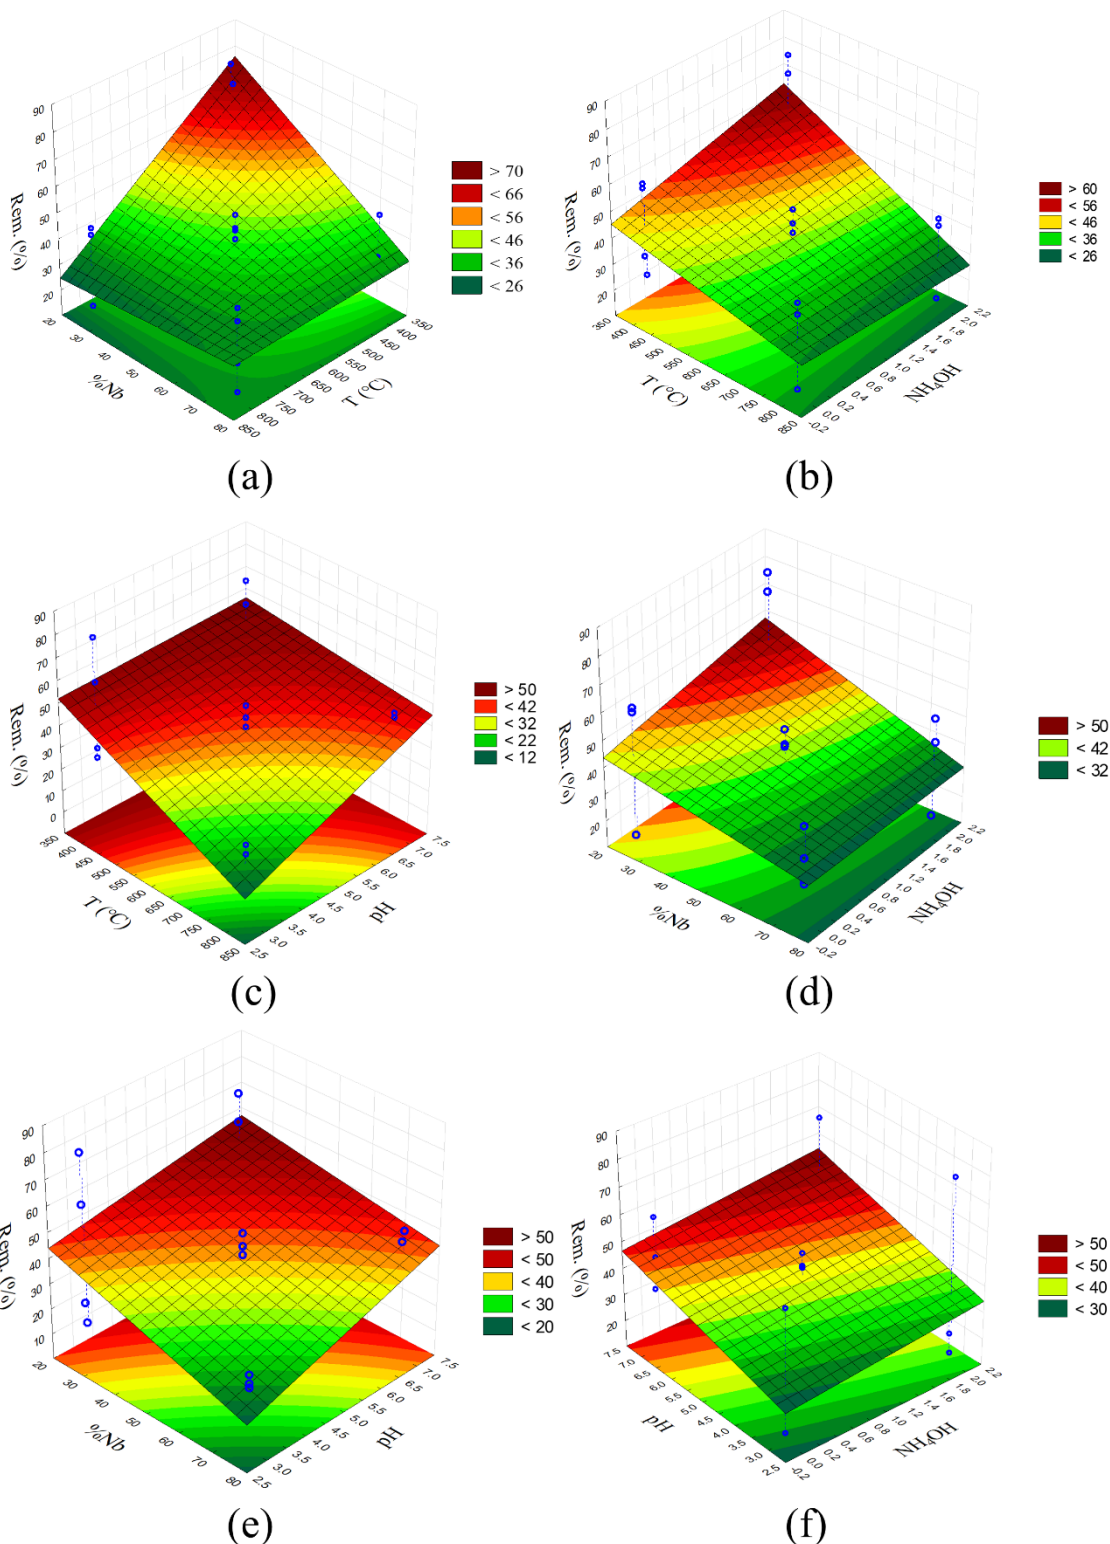

**Figure S2** – Response surfaces – linear model - for SA degradation (%) obtained in the four-factor experimental design ( $2^4$ ), using catalysts containing between 25 and 75% of Nb – molecular basis, in relation to the total number of mols of metals. SA removal (%) in the function of (a) %Nb and T(°C); (b) T(°C) and NH<sub>4</sub>OH; (c) T(°C) and pH; (d) %Nb and NH<sub>4</sub>OH; (e) %Nb and pH; (f) pH and NH<sub>4</sub>OH. Plotted surface  $R^2=0.96405$ . Variables not indicated in each graph were kept at a fixed value corresponding to their center point value (0 in coded variables).

## 2.2. Three-factors and three levels experimental design (3<sup>3</sup>) – SA Photocatalysis

**Table S3** – Photocatalytic results of the 3<sup>3</sup> experimental design.

| Real Variables   |            |                    |          | Coded Variables |          |                    |          | Response      |
|------------------|------------|--------------------|----------|-----------------|----------|--------------------|----------|---------------|
| %Nb              | T          | NH <sub>4</sub> OH | pH       | %Nb             | T        | NH <sub>4</sub> OH | pH       | Rem(%) 30 min |
| TiO <sub>2</sub> | 400        | 0                  | 3        | -1              | 0        | -1                 | -1       | 42.77%        |
| TiO <sub>2</sub> | 400        | 0                  | 5        | -1              | 0        | -1                 | 0        | 72.86%        |
| TiO <sub>2</sub> | 400        | 0                  | 7        | -1              | 0        | -1                 | 1        | 68.56%        |
| TiO <sub>2</sub> | 400        | 1                  | 3        | -1              | 0        | 0                  | -1       | 43.86%        |
| TiO <sub>2</sub> | 400        | 1                  | 5        | -1              | 0        | 0                  | 0        | 61.95%        |
| TiO <sub>2</sub> | 400        | 1                  | 7        | -1              | 0        | 0                  | 1        | 62.66%        |
| TiO <sub>2</sub> | 400        | 2                  | 3        | -1              | 0        | 1                  | -1       | 37.15%        |
| TiO <sub>2</sub> | 400        | 2                  | 5        | -1              | 0        | 1                  | 0        | 69.66%        |
| TiO <sub>2</sub> | 400        | 2                  | 7        | -1              | 0        | 1                  | 1        | 57.84%        |
| 12.5             | 400        | 0                  | 3        | 0               | 0        | -1                 | -1       | 43.92%        |
| 12.5             | 400        | 0                  | 5        | 0               | 0        | -1                 | 0        | 51.65%        |
| 12.5             | 400        | 0                  | 7        | 0               | 0        | -1                 | 1        | 48.87%        |
| 12.5             | 400        | 1                  | 3        | 0               | 0        | 0                  | -1       | 50.02%        |
| <b>12.5</b>      | <b>400</b> | <b>1</b>           | <b>5</b> | <b>0</b>        | <b>0</b> | <b>0</b>           | <b>0</b> | <b>57.18%</b> |
| <b>12.5</b>      | <b>400</b> | <b>1</b>           | <b>5</b> | <b>0</b>        | <b>0</b> | <b>0</b>           | <b>0</b> | <b>54.73%</b> |
| <b>12.5</b>      | <b>400</b> | <b>1</b>           | <b>5</b> | <b>0</b>        | <b>0</b> | <b>0</b>           | <b>0</b> | <b>57.25%</b> |
| <b>12.5</b>      | <b>400</b> | <b>1</b>           | <b>5</b> | <b>0</b>        | <b>0</b> | <b>0</b>           | <b>0</b> | <b>52.63%</b> |
| 12.5             | 400        | 1                  | 7        | 0               | 0        | 0                  | 1        | 50.02%        |
| 12.5             | 400        | 2                  | 3        | 0               | 0        | 1                  | -1       | 45.12%        |
| 12.5             | 400        | 2                  | 5        | 0               | 0        | 1                  | 0        | 48.59%        |
| 12.5             | 400        | 2                  | 7        | 0               | 0        | 1                  | 1        | 44.35%        |
| 25               | 400        | 0                  | 3        | 1               | 0        | -1                 | -1       | 49.75%        |
| 25               | 400        | 0                  | 5        | 1               | 0        | -1                 | 0        | 45.41%        |
| 25               | 400        | 0                  | 7        | 1               | 0        | -1                 | 1        | 45.03%        |
| 25               | 400        | 1                  | 3        | 1               | 0        | 0                  | -1       | 59.88%        |
| 25               | 400        | 1                  | 5        | 1               | 0        | 0                  | 0        | 49.03%        |
| 25               | 400        | 1                  | 7        | 1               | 0        | 0                  | 1        | 52.45%        |
| 25               | 400        | 2                  | 3        | 1               | 0        | 1                  | -1       | 41.81%        |
| 25               | 400        | 2                  | 5        | 1               | 0        | 1                  | 0        | 54.18%        |
| 25               | 400        | 2                  | 7        | 1               | 0        | 1                  | 1        | 47.65%        |

**Table S4** – ANOVA table of the 3<sup>3</sup> experimental design. Significant effects are highlighted in bold

|                            | SS              | df        | MS                 | F                  | p               |
|----------------------------|-----------------|-----------|--------------------|--------------------|-----------------|
| <b>Regression</b>          | <b>0.205368</b> | <b>18</b> | <b>0.011409333</b> | <b>8.736697993</b> | <b>0.000386</b> |
| <b>(1)% Nb(L)</b>          | <b>0.028905</b> | <b>1</b>  | <b>0.028905</b>    | <b>58.97732</b>    | <b>0.004587</b> |
| <b>% Nb(Q)</b>             | <b>0.012698</b> | <b>1</b>  | <b>0.012698</b>    | <b>25.90843</b>    | <b>0.014656</b> |
| (2)NH <sub>4</sub> OH(L)   | 0.002807        | 1         | 0.002807           | 5.72772            | 0.096457        |
| <b>NH<sub>4</sub>OH(Q)</b> | <b>0.007715</b> | <b>1</b>  | <b>0.007715</b>    | <b>15.74110</b>    | <b>0.028612</b> |
| <b>(3)pH(L)</b>            | <b>0.022149</b> | <b>1</b>  | <b>0.022149</b>    | <b>45.19211</b>    | <b>0.006719</b> |
| <b>pH(Q)</b>               | <b>0.035076</b> | <b>1</b>  | <b>0.035076</b>    | <b>71.56830</b>    | <b>0.003467</b> |
| 1L by 2L                   | 0.004405        | 1         | 0.004405           | 8.98720            | 0.057767        |
| <b>1L by 2Q</b>            | <b>0.007163</b> | <b>1</b>  | <b>0.007163</b>    | <b>14.61524</b>    | <b>0.031510</b> |
| 1Q by 2L                   | 0.000031        | 1         | 0.000031           | 0.06253            | 0.818682        |
| 1Q by 2Q                   | 0.002043        | 1         | 0.002043           | 4.16771            | 0.133854        |
| <b>1L by 3L</b>            | <b>0.042717</b> | <b>1</b>  | <b>0.042717</b>    | <b>87.15880</b>    | <b>0.002602</b> |
| <b>1L by 3Q</b>            | <b>0.025294</b> | <b>1</b>  | <b>0.025294</b>    | <b>51.61040</b>    | <b>0.005557</b> |
| <b>1Q by 3L</b>            | <b>0.007121</b> | <b>1</b>  | <b>0.007121</b>    | <b>14.53040</b>    | <b>0.031748</b> |
| 1Q by 3Q                   | 0.000683        | 1         | 0.000683           | 1.39454            | 0.322737        |
| 2L by 3L                   | 0.000001        | 1         | 0.000001           | 0.00123            | 0.974245        |
| 2L by 3Q                   | 0.002503        | 1         | 0.002503           | 5.10626            | 0.108956        |
| 2Q by 3L                   | 0.002349        | 1         | 0.002349           | 4.79310            | 0.116329        |
| <b>2Q by 3Q</b>            | <b>0.005363</b> | <b>1</b>  | <b>0.005363</b>    | <b>10.94359</b>    | <b>0.045456</b> |
| Lack of Fit                | 0.012895        | 8         | 0.001612           | 3.28874            | 0.178122        |
| Pure Error                 | 0.001470        | 3         | 0.000490           |                    |                 |
| Total SS                   | 0.219733        | 29        |                    |                    |                 |

**Table S5** – Effects Estimate. Variables as coded variables of the 3<sup>3</sup> experimental design. Significant effects are highlighted in bold

|                            | Effect           | Std.Err.        | t(3)            | p               | -95.%            | +95.%            | Coeff.           | Std.Err.        | -95.%            | +95.%            |
|----------------------------|------------------|-----------------|-----------------|-----------------|------------------|------------------|------------------|-----------------|------------------|------------------|
| Mean/Interc.               | <b>0.519943</b>  | <b>0.004184</b> | <b>124.2769</b> | <b>0.000001</b> | <b>0.506628</b>  | <b>0.533257</b>  | <b>0.519943</b>  | <b>0.004184</b> | <b>0.506628</b>  | <b>0.533257</b>  |
| (1)% Nb(L)                 | <b>-0.080146</b> | <b>0.010436</b> | <b>-7.6797</b>  | <b>0.004587</b> | <b>-0.113358</b> | <b>-0.046933</b> | <b>-0.040073</b> | <b>0.005218</b> | <b>-0.056679</b> | <b>-0.023467</b> |
| % Nb(Q)                    | <b>-0.044330</b> | <b>0.008709</b> | <b>-5.0900</b>  | <b>0.014656</b> | <b>-0.072046</b> | <b>-0.016613</b> | <b>-0.022165</b> | <b>0.004355</b> | <b>-0.036023</b> | <b>-0.008307</b> |
| (2)NH <sub>4</sub> OH(L)   | -0.024976        | 0.010436        | -2.3933         | 0.096457        | -0.058189        | 0.008236         | -0.012488        | 0.005218        | -0.029094        | 0.004118         |
| <b>NH<sub>4</sub>OH(Q)</b> | <b>0.034554</b>  | <b>0.008709</b> | <b>3.9675</b>   | <b>0.028612</b> | <b>0.006837</b>  | <b>0.062270</b>  | <b>0.017277</b>  | <b>0.004355</b> | <b>0.003419</b>  | <b>0.031135</b>  |
| <b>(3)pH(L)</b>            | <b>0.070157</b>  | <b>0.010436</b> | <b>6.7225</b>   | <b>0.006719</b> | <b>0.036944</b>  | <b>0.103369</b>  | <b>0.035078</b>  | <b>0.005218</b> | <b>0.018472</b>  | <b>0.051684</b>  |
| <b>pH(Q)</b>               | <b>0.073678</b>  | <b>0.008709</b> | <b>8.4598</b>   | <b>0.003467</b> | <b>0.045961</b>  | <b>0.101394</b>  | <b>0.036839</b>  | <b>0.004355</b> | <b>0.022981</b>  | <b>0.050697</b>  |
| 1L by 2L                   | 0.038317         | 0.012782        | 2.9979          | 0.057767        | -0.002359        | 0.078994         | 0.019159         | 0.006391        | -0.001180        | 0.039497         |
| <b>1L by 2Q</b>            | <b>0.042317</b>  | <b>0.011069</b> | <b>3.8230</b>   | <b>0.031510</b> | <b>0.007090</b>  | <b>0.077544</b>  | <b>0.021159</b>  | <b>0.005535</b> | <b>0.003545</b>  | <b>0.038772</b>  |
| 1Q by 2L                   | 0.002768         | 0.011069        | 0.2501          | 0.818682        | -0.032459        | 0.037995         | 0.001384         | 0.005535        | -0.016229        | 0.018997         |
| 1Q by 2Q                   | 0.018118         | 0.008875        | 2.0415          | 0.133854        | -0.010126        | 0.046363         | 0.009059         | 0.004438        | -0.005063        | 0.023181         |
| <b>1L by 3L</b>            | <b>-0.119327</b> | <b>0.012782</b> | <b>-9.3359</b>  | <b>0.002602</b> | <b>-0.160004</b> | <b>-0.078650</b> | <b>-0.059664</b> | <b>0.006391</b> | <b>-0.080002</b> | <b>-0.039325</b> |
| <b>1L by 3Q</b>            | <b>-0.079521</b> | <b>0.011069</b> | <b>-7.1840</b>  | <b>0.005557</b> | <b>-0.114748</b> | <b>-0.044294</b> | <b>-0.039761</b> | <b>0.005535</b> | <b>-0.057374</b> | <b>-0.022147</b> |
| <b>1Q by 3L</b>            | <b>-0.042194</b> | <b>0.011069</b> | <b>-3.8119</b>  | <b>0.031748</b> | <b>-0.077421</b> | <b>-0.006967</b> | <b>-0.021097</b> | <b>0.005535</b> | <b>-0.038711</b> | <b>-0.003484</b> |
| 1Q by 3Q                   | -0.010481        | 0.008875        | -1.1809         | 0.322737        | -0.038725        | 0.017764         | -0.005240        | 0.004438        | -0.019362        | 0.008882         |
| 2L by 3L                   | -0.000448        | 0.012782        | -0.0350         | 0.974245        | -0.041124        | 0.040229         | -0.000224        | 0.006391        | -0.020562        | 0.020114         |
| 2L by 3Q                   | 0.025013         | 0.011069        | 2.2597          | 0.108956        | -0.010214        | 0.060240         | 0.012506         | 0.005535        | -0.005107        | 0.030120         |
| 2Q by 3L                   | -0.024234        | 0.011069        | -2.1893         | 0.116329        | -0.059461        | 0.010993         | -0.012117        | 0.005535        | -0.029730        | 0.005497         |
| <b>2Q by 3Q</b>            | <b>-0.029360</b> | <b>0.008875</b> | <b>-3.3081</b>  | <b>0.045456</b> | <b>-0.057604</b> | <b>-0.001115</b> | <b>-0.014680</b> | <b>0.004438</b> | <b>-0.028802</b> | <b>-0.000558</b> |

### 2.3. Two-factors and three levels experimental design (3<sup>2</sup>) – MB adsorption

**Table S6** – ANOVA table of the 3<sup>2</sup> experimental design. Significant effects are highlighted in bold

|                                 | SS             | df       | MS              | F               | p               |
|---------------------------------|----------------|----------|-----------------|-----------------|-----------------|
| <b>(1) %Nb(L)</b>               | <b>9063.69</b> | <b>1</b> | <b>9063.689</b> | <b>16482.85</b> | <b>0.000061</b> |
| <b>%Nb(Q)</b>                   | <b>2822.22</b> | <b>1</b> | <b>2822.215</b> | <b>5132.37</b>  | <b>0.000195</b> |
| <b>(2) NH<sub>4</sub>OH (L)</b> | <b>117.84</b>  | <b>1</b> | <b>117.844</b>  | <b>214.31</b>   | <b>0.004634</b> |
| <b>NH<sub>4</sub>OH (Q)</b>     | <b>13.04</b>   | <b>1</b> | <b>13.035</b>   | <b>23.71</b>    | <b>0.039690</b> |
| <b>1L by 2L</b>                 | <b>53.02</b>   | <b>1</b> | <b>53.017</b>   | <b>96.41</b>    | <b>0.010213</b> |
| <b>1L by 2Q</b>                 | <b>109.15</b>  | <b>1</b> | <b>109.152</b>  | <b>198.50</b>   | <b>0.005000</b> |
| <b>1Q by 2L</b>                 | <b>13.30</b>   | <b>1</b> | <b>13.302</b>   | <b>24.19</b>    | <b>0.038940</b> |
| <b>1Q by 2Q</b>                 | <b>35.20</b>   | <b>1</b> | <b>35.200</b>   | <b>64.01</b>    | <b>0.015265</b> |
| Pure Error                      | 1.10           | 2        | 0.550           |                 |                 |
| Total SS                        | 13081.23       | 10       |                 |                 |                 |

**Table S7** – Effects Estimate. Variables as coded variables of the 3<sup>3</sup> experimental design. Significant effects are highlighted in bold

|                                 | Effect          | Std.Err.        | t(2)            | p               | -95.%           | +95.%           | Coeff.          | Std.Err.        | -95.%           | +95.%           |
|---------------------------------|-----------------|-----------------|-----------------|-----------------|-----------------|-----------------|-----------------|-----------------|-----------------|-----------------|
| <b>Mean/Interc.</b>             | <b>57.23761</b> | <b>0.237850</b> | <b>240.6458</b> | <b>0.000017</b> | <b>56.21423</b> | <b>58.26100</b> | <b>57.23761</b> | <b>0.237850</b> | <b>56.21423</b> | <b>58.26100</b> |
| <b>(1) %Nb (L)</b>              | <b>77.73326</b> | <b>0.605467</b> | <b>128.3856</b> | <b>0.000061</b> | <b>75.12814</b> | <b>80.33837</b> | <b>38.86663</b> | <b>0.302734</b> | <b>37.56407</b> | <b>40.16919</b> |
| <b>%Nb(Q)</b>                   | <b>34.67066</b> | <b>0.483953</b> | <b>71.6405</b>  | <b>0.000195</b> | <b>32.58838</b> | <b>36.75294</b> | <b>17.33533</b> | <b>0.241977</b> | <b>16.29419</b> | <b>18.37647</b> |
| <b>(2) NH<sub>4</sub>OH (L)</b> | <b>8.86355</b>  | <b>0.605467</b> | <b>14.6392</b>  | <b>0.004634</b> | <b>6.25843</b>  | <b>11.46866</b> | <b>4.43177</b>  | <b>0.302734</b> | <b>3.12922</b>  | <b>5.73433</b>  |
| <b>NH<sub>4</sub>OH (Q)</b>     | <b>2.35626</b>  | <b>0.483953</b> | <b>4.8688</b>   | <b>0.039690</b> | <b>0.27398</b>  | <b>4.43855</b>  | <b>1.17813</b>  | <b>0.241977</b> | <b>0.13699</b>  | <b>2.21927</b>  |
| <b>1L by 2L</b>                 | <b>7.28129</b>  | <b>0.741543</b> | <b>9.8191</b>   | <b>0.010213</b> | <b>4.09069</b>  | <b>10.47189</b> | <b>3.64064</b>  | <b>0.370771</b> | <b>2.04534</b>  | <b>5.23595</b>  |
| <b>1L by 2Q</b>                 | <b>9.04786</b>  | <b>0.642195</b> | <b>14.0890</b>  | <b>0.005000</b> | <b>6.28472</b>  | <b>11.81101</b> | <b>4.52393</b>  | <b>0.321098</b> | <b>3.14236</b>  | <b>5.90550</b>  |
| <b>1Q by 2L</b>                 | <b>3.15854</b>  | <b>0.642195</b> | <b>4.9184</b>   | <b>0.038940</b> | <b>0.39540</b>  | <b>5.92169</b>  | <b>1.57927</b>  | <b>0.321098</b> | <b>0.19770</b>  | <b>2.96084</b>  |
| <b>1Q by 2Q</b>                 | <b>3.73272</b>  | <b>0.466544</b> | <b>8.0008</b>   | <b>0.015265</b> | <b>1.72535</b>  | <b>5.74010</b>  | <b>1.86636</b>  | <b>0.233272</b> | <b>0.86267</b>  | <b>2.87005</b>  |

### 3. Adsorption isotherms

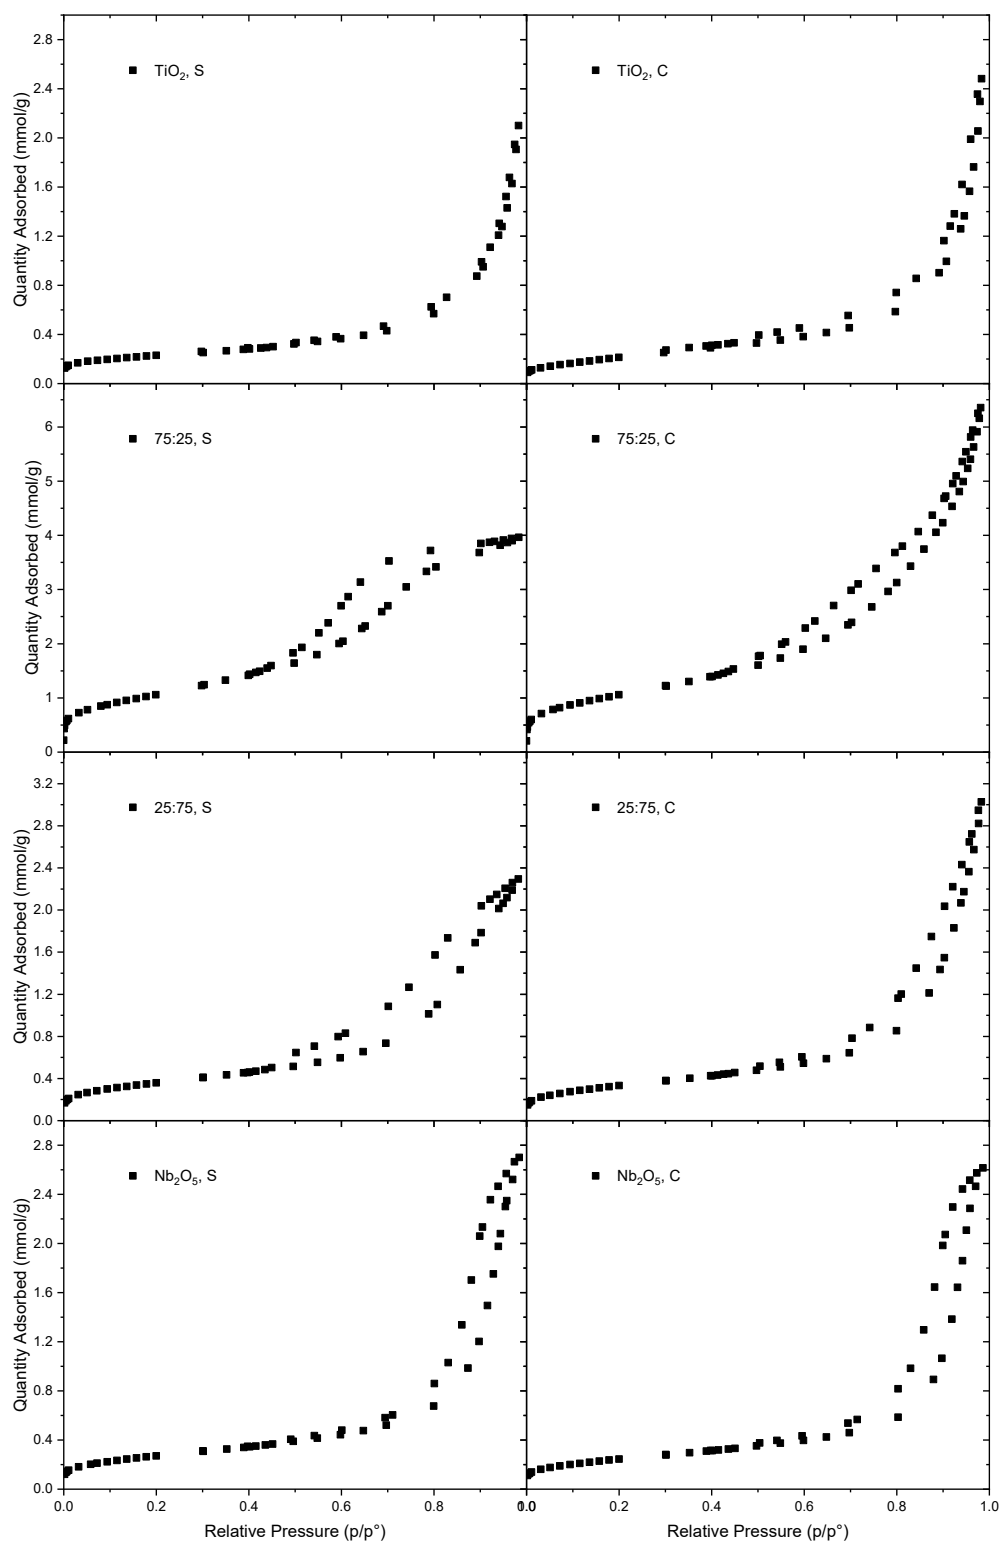

**Figure S3** – Adsorption isotherms of the samples calcined at 400°C. Percentages of Ti:Nb. S=0 mol of NH<sub>4</sub>OH. C=2 mol of NH<sub>4</sub>OH.

#### 4. Photoacoustic spectroscopy results

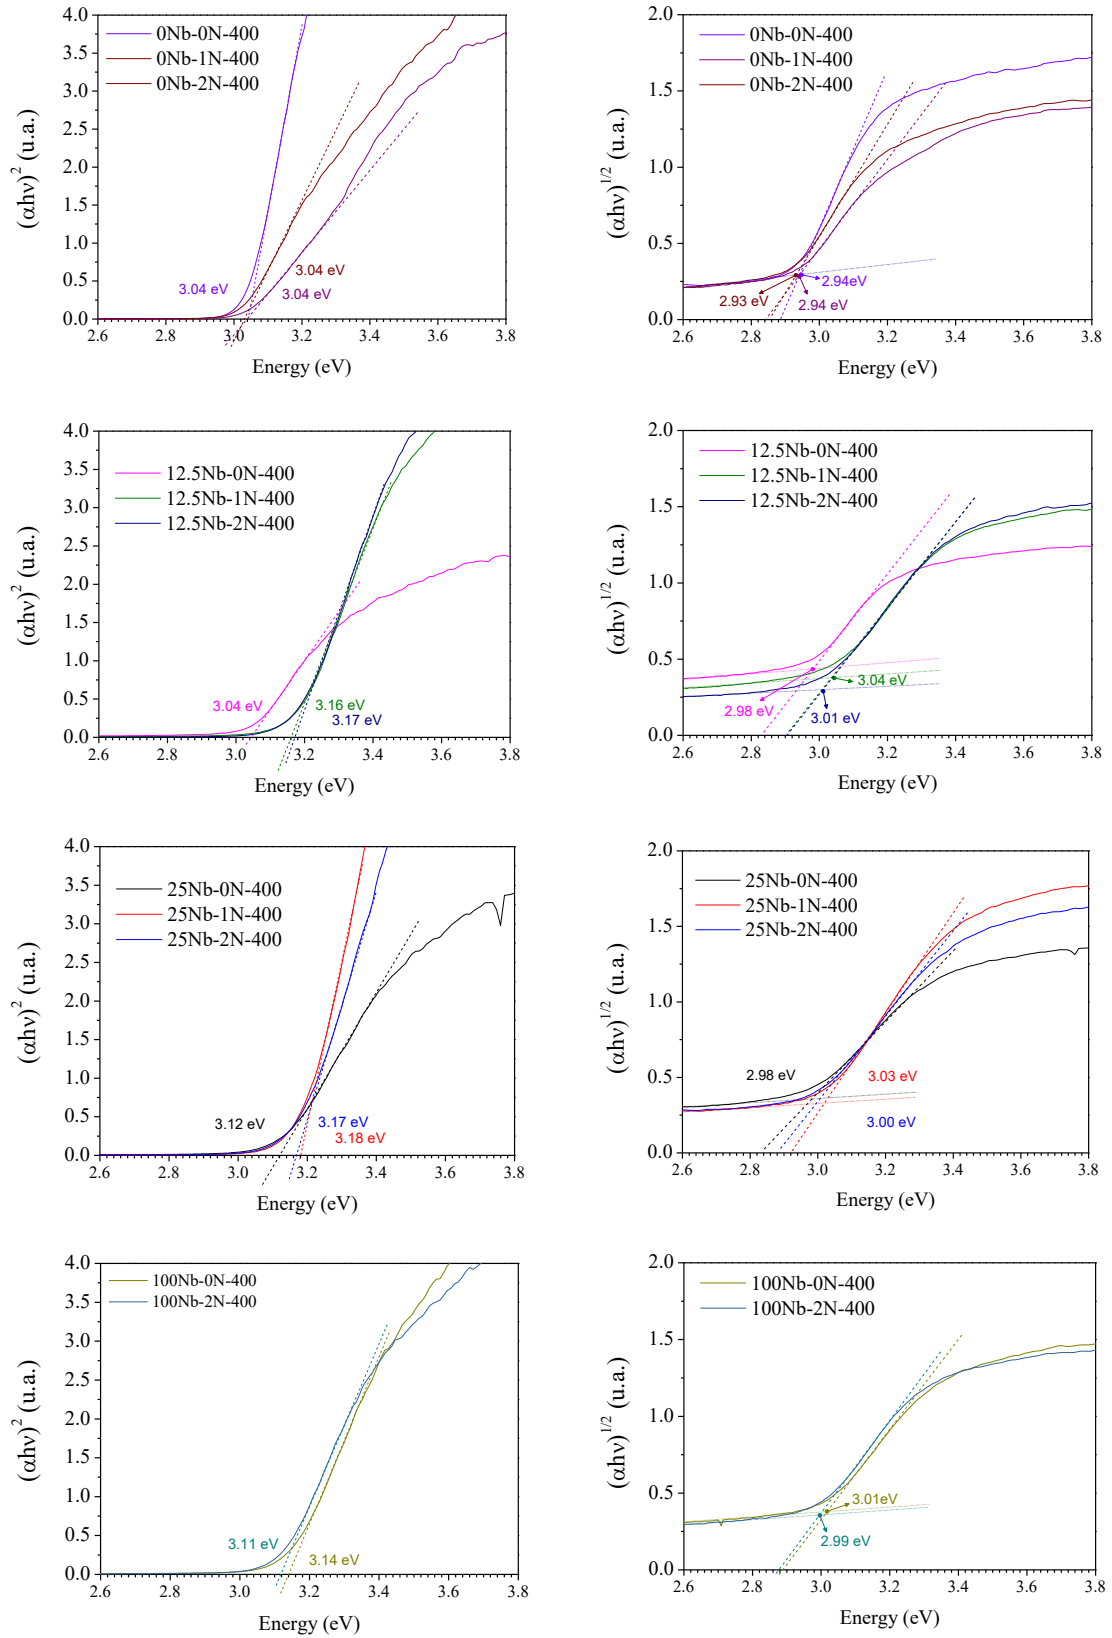

**Figure S4** – Tauc plots for direct and indirect band gap estimations. Data obtained from photoacoustic spectroscopy analysis.
